# Supplementary material
Source: Springer Nature journal article supplement (https://www.springermedizin.de/resource/supplementary/12961_2010_381_MOESM1_ESM.pdf/9571570)

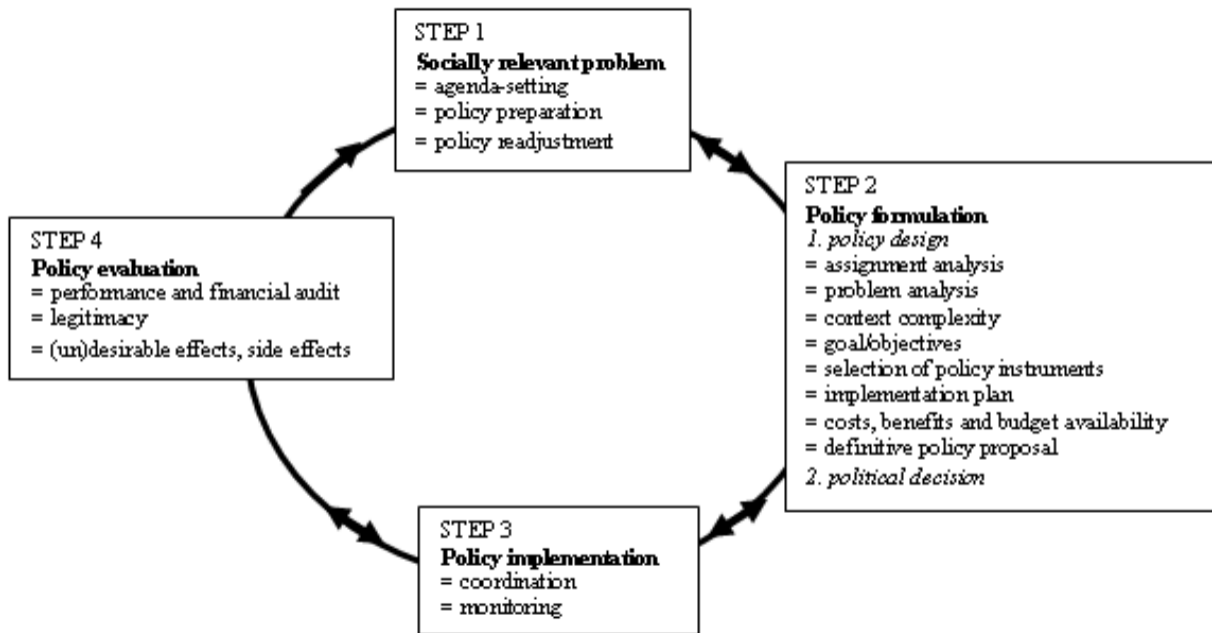

Supplement: MOESM1 [file 9571570]
